# Supplementary material for: Separation of dithiothreitol and dithioerythritol by an open tubular capillary electrochromatographic column with an MOF modified by histidine as the stationary phase
Source: Royal Society of Chemistry journal article supplement (doi:10.1039/d5ay00097a), 2025-01-01
Supplement: d5ay00097a1.pdf [file d5ay00097a1.pdf]

## **Supporting Information**

### **Separation of dithiothreitol and dithioerythritol by an open tubular capillary electrochromatographic column with a MOF modified by histidine as stationary phase**

Mo Chen<sup>1</sup>, Lidi Gao<sup>1,2</sup>, Huiying Liu<sup>1</sup>, Jiawen Yu<sup>1</sup>, Fuquan Zhao<sup>1</sup>, Liming Bai<sup>1</sup>, Hongtao  
Chu<sup>1,2</sup>, Ming Zhao<sup>1,2</sup>, Shili Qin<sup>1,2,\*</sup>

<sup>1</sup>College of Chemistry and Chemical Engineering, Qiqihar University, Qiqihar 161006, China.

<sup>2</sup>Heilongjiang Industrial Hemp Processing Technology Innovation Center, Qiqihar University,  
Qiqihar 161006, China.

\*Correspondence: Shili Qin, College of Chemistry and Chemical Engineering, Qiqihar  
University, Qiqihar 161006, China. Email: qinshili1103@163.com

# 1. Experimental Methods:

## 1.1 Preparation of ZIF-93

ZIF-93 was prepared according to the previous reported method<sup>[1]</sup>. 367 mg of  $\text{Zn}(\text{CH}_3\text{COO})_2 \cdot 2\text{H}_2\text{O}$  and 550 mg of aImeIm were accurately weighed and added to 25 mL of methanol. After the mixture ultrasonically dissolving, it was transferred into a 50 mL Teflon lined autoclave and sealed. The autoclave was held at 85 °C for 24 h. After the reaction, reaction mixture was centrifuged. The precipitate was washed with methanol three times, then dried under vacuum at 85 °C overnight.

## 1.2 Preparation and composition of borax-HCl buffer

Weigh 38.14 g of borax ( $\text{Na}_2\text{B}_4\text{O}_7 \cdot 10\text{H}_2\text{O}$ ) and dissolve in 1.0 L of ultrapure water to obtain the stock borax solution of 100 mM.

The 10-40 mM Borax-HCl buffer with pH 7.0-9.0 were prepared by first diluting the stock borax solution the desired concentration, and then by titration of the borax solutions with HCl to the desired pH value.

## 1.3 Preparation of the sample solution

DTT and DTE powder was kept in -20 °C freezer before use. The standard solution (10.0 mg/mL) of DTT and DTE was made by dissolving DTT and DTE in a small volume of ultrapure water individually, then being diluted with ultrapure water, and stored at 4 °C in a refrigerator (Just in time). The test solutions were obtained by mixing the standard solutions or diluting the mixture standard solutions to appropriate concentrations. Before use, all the solutions were filtered through a 0.45 µm membrane and degassed by sonication.

## 1.4 CEC calculation formulas

In the CEC analysis results, the resolutions ( $R_s$ ) and the selectivity factors ( $\alpha$ ) between DTE and DTT are calculated according to Equations (1) and (2):

$$R_s = 2(t_2 - t_1) / (W_1 + W_2) \quad (1)$$

$$\alpha = t_2 / t_1 \quad (2)$$

Here,  $t_1$ ,  $W_1$  and  $t_2$ ,  $W_2$  represent the retention time and the peak widths of DTE and DTT

(s), respectively.

Electroosmotic flow ( $\mu_{EOF}$ ) is determined with thiourea as a neutral marker and calculated according to Equation (3):

$$\mu_{EOF} = L \times l / (V \times t_0) \quad (3)$$

Here,  $L$  and  $l$  represent the total length (cm) and effective length (cm) of the capillary column;  $V$  is the CEC separation voltage (kV) and  $t_0$  is the retention time of thiourea (s).

Column efficiency are calculated according to Equation (4):

$$N = 5.54 (t_R / W_{1/2})^2 / l \times 100 \quad (4)$$

Here,  $t_R$  and  $W_{1/2}$  represent the retention time and the half-peak width of DTE or DTT (s), respectively;  $l$  represents the effective column length (cm).

## 1.5 CEC conditions

All CEC experiments were conducted on an Agilent 7100 CE system (Waldbronn, Germany) equipped with a diode array detector, and operated at room temperature. The capillary column of 75  $\mu\text{m}$  i.d. and 375  $\mu\text{m}$  o.d. from Yongnian Optic Fiber Factory (Handan, China) was used. Total length and the effective length of the prepared His-ZIF-93 column were 34.0 cm and 25.5 cm, respectively. Borax-HCl buffer was used (SI 1.2). Pressure injection was 50 mbar  $\times$  3 s. The detection wavelength of DTT and DTE was set at 230 nm. Before each CEC experiment, the OT column was flushed with ultrapure water and the corresponding borax-HCl buffer for 3 min, respectively. All solutions were filtered by 0.45  $\mu\text{m}$  filter membrane, and then sonicated for 4 min for use.

## 1.6 Determination of binding constants

According to the methods reported<sup>[2]</sup>, 0.01, 0.02, 0.03, 0.04, 0.05, 0.06 mg/mL of His-ZIF-93 dispersion were obtained by dispersing the appropriate amount of His-ZIF-93 in borax-HCl buffer (30 mM, pH = 8.5), respectively. 2 mL of each dispersion was taken and mixed with 2 mL of DTT or DTE (25  $\mu\text{g/mL}$ ), respectively. The mixtures were shaken at 150 rpm for 60 min at room temperature. Then, sonicated for 5 min before analysis. The UV absorption spectra from 230 to 320 nm of the mixtures were measured using an UV-1901 spectrophotometer (Persee, China). Benesi-Hildebrand absorption plots for the interaction of

DTT and DTE with His-ZIF-93 were obtained and the binding constants of His-ZIF-93 for DTT and DTE were calculated.

## 2. Supporting Figures:

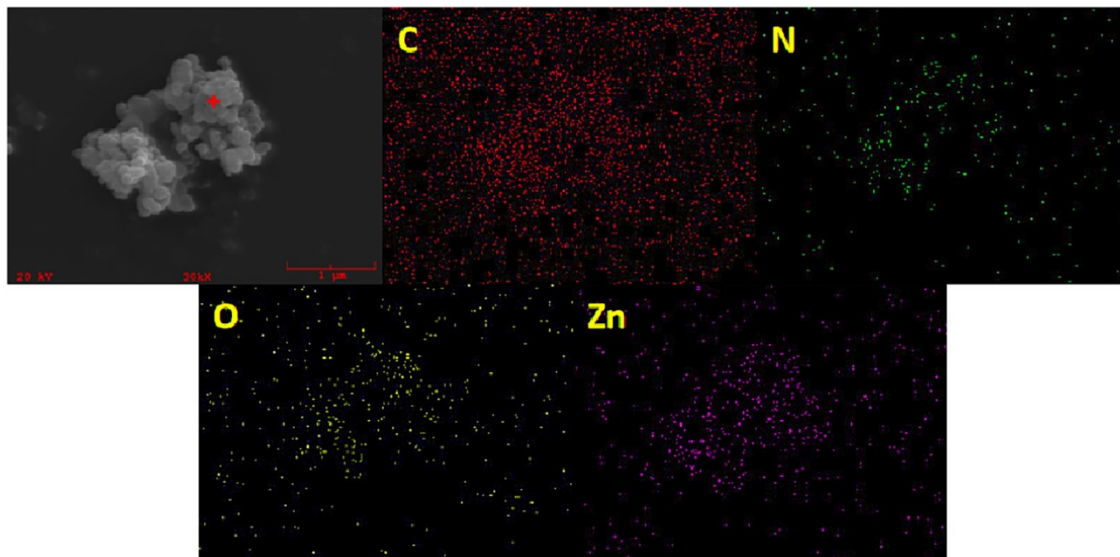

Fig. S1 SEM image and EDS mapping of His-ZIF-93.

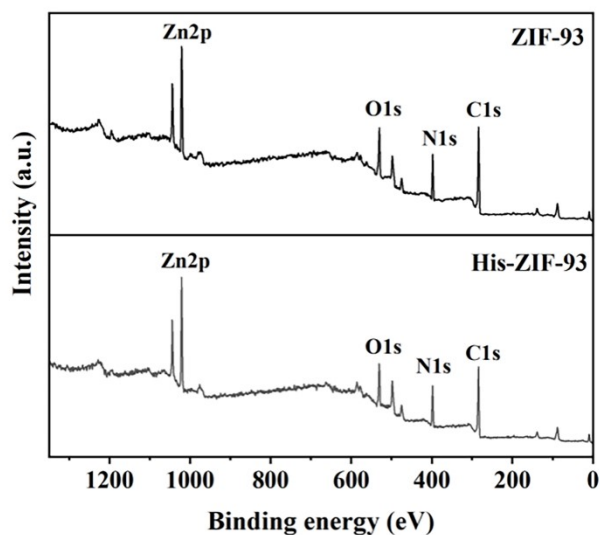

Fig. S2 XPS spectra of His-ZIF-93 and ZIF-93.

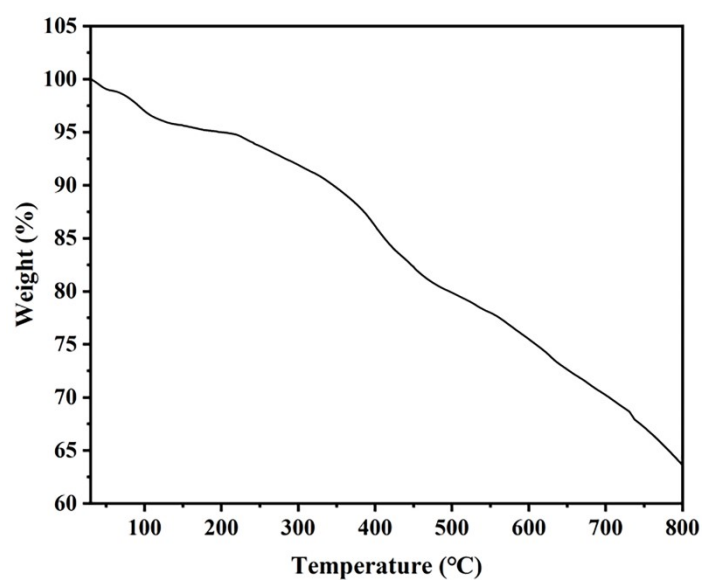

**Fig. S3** TGA curve of His-ZIF-93.

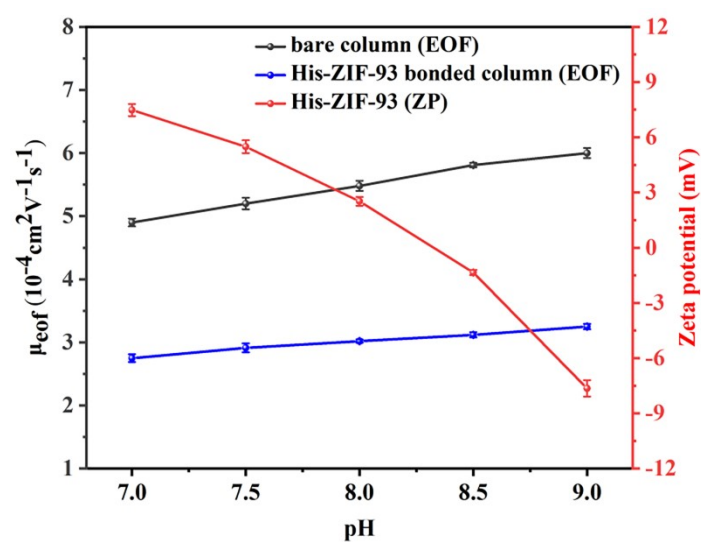

**Fig. S4** The effect of buffer pH on EOF (Experimental conditions: sample, 0.1 mg/mL thiourea, 30 mM of borax-HCl buffer, voltage, 15 kV) and ZP curve of His-ZIF-93 (Experimental conditions: 0.2 mg/mL of His-ZIF-93, 30mM borax-HCl buffer).

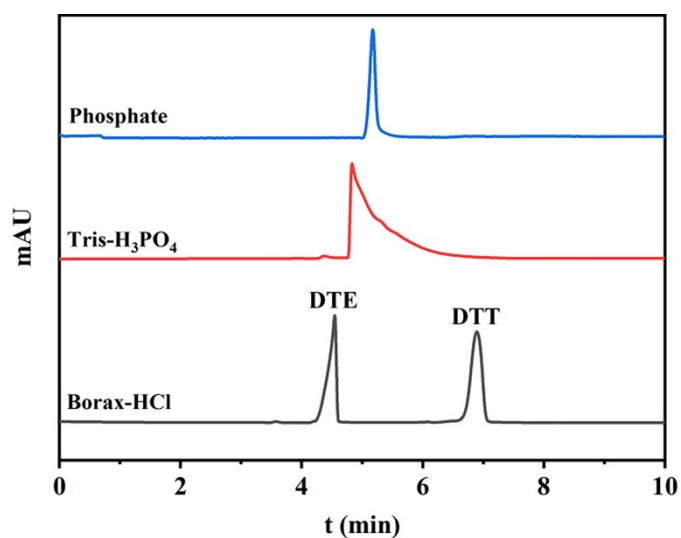

**Fig. S5** Effect of buffer types on the separation of DTT and DTE on His-ZIF-93 column (Experimental conditions: 30 mM buffer, pH=8.5, voltage 15 kV, detection wavelength 230 nm).

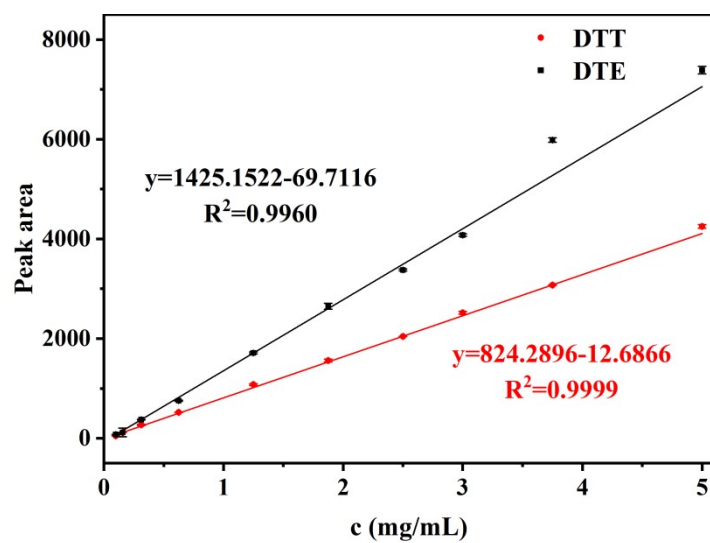

**Fig. S6** The standard curves of DTT and DTE (n=5) (Experimental conditions: 30 mM borax-HCl buffer, pH=8.5, voltage 15 kV, detection wavelength 230 nm)

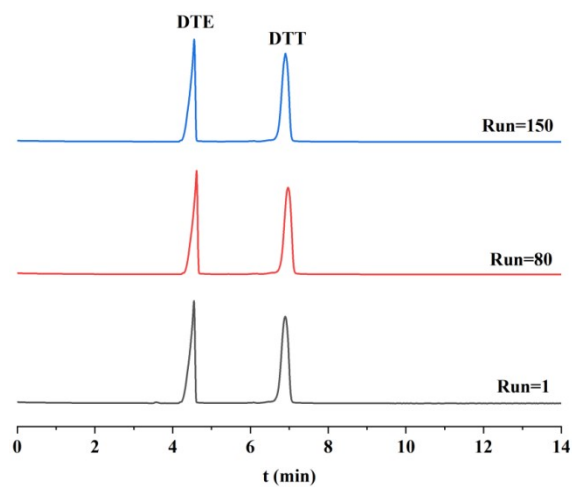

**Fig. S7** Separation chromatograms of DTT and DTE with different runs (Experimental conditions: 5.0 mg/mL, 30 mM borax-HCl buffer, pH=8.5, voltage 15 kV, detection wavelength 230 nm).

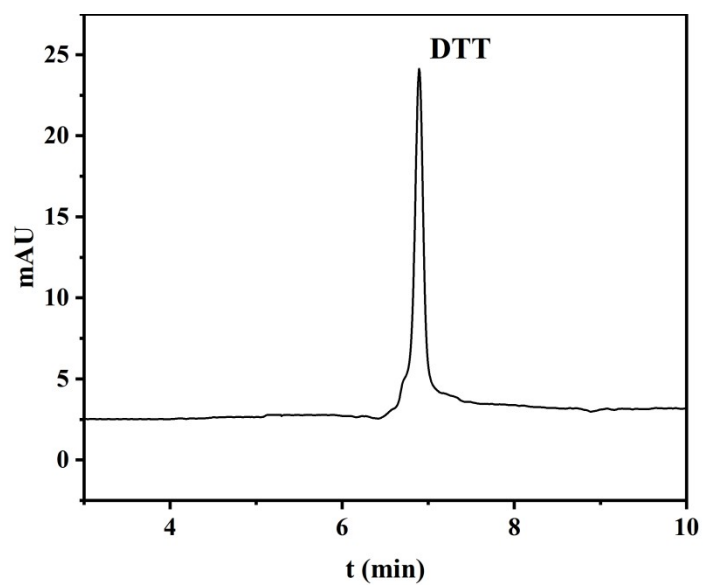

**Fig. S8** Electropherogram of the commercially available DTT sample by His-ZIF-93 column (Experimental conditions: 1.0 mg/mL, 30 mM borax-HCl buffer, pH=8.5, voltage 15 kV, detection wavelength 230 nm).

### 3. Supporting Tables:

**Table S1** The elemental content of His-ZIF-93 and ZIF-93 by EDS

| Element | Wt% of His-ZIF-93 | Wt% of ZIF-93 |
|---------|-------------------|---------------|
| C       | 36.44             | 37.89         |
| N       | 18.76             | 5.19          |
| O       | 24.67             | 7.59          |
| Zn      | 20.13             | 49.33         |

**Table S2** The specific surface area and pore size of His-ZIF-93 and ZIF-93

| Materials             | BET (m <sup>2</sup> /g) | D (nm) |
|-----------------------|-------------------------|--------|
| His-ZIF-93            | 545                     | 3.99   |
| ZIF-93 <sup>[3]</sup> | 864                     | < 2    |

**Table S3** Binding constants of His-ZIF-93 on DTT and DTE

| Stationary phases | Analytes | K (mL/mg) |
|-------------------|----------|-----------|
| His-ZIF-93        | DTE      | 49.26     |
|                   | DTT      | 51.81     |

**Table S4** Reproducibility and stability of DTT and DTE on His-ZIF-93 OT-CEC column

| Type and Numbers         | RSD (%) of retention time |      | RSD (%) of column efficiency |      |
|--------------------------|---------------------------|------|------------------------------|------|
|                          | DTE                       | DTT  | DTE                          | DTT  |
| Run-to-run (n = 9)       | 0.98                      | 1.24 | 1.78                         | 2.16 |
| Day-to-day (n = 5)       | 1.78                      | 1.92 | 2.01                         | 2.23 |
| Column-to-column (n = 5) | 1.93                      | 2.07 | 2.67                         | 2.84 |
| Batch to batch (n=3)     | 3.10                      | 3.26 | 3.35                         | 3.44 |
| Runs (n = 150)           | 2.06                      | 2.45 | 2.23                         | 2.58 |



**Table S5** Comparison of this work and previous reports on the determination of DTT or DTE

| Analytes | Methods                | Application                           | Detection time | LOD                                        | Ref.      |
|----------|------------------------|---------------------------------------|----------------|--------------------------------------------|-----------|
| DTT      | Fluorescent probe      | Living cells                          | 10 min         | $3.1 \times 10^{-7}$ mol/L                 | [4]       |
|          | Colorimetric method    | /                                     | <10 min        | 0.3 $\mu$ mol/L                            | [5]       |
|          | Fluorescent probe      | /                                     | 5 min          | 0.07 mol/L                                 | [6]       |
|          | HPLC-MS                | Protein mixtures                      | 23 min         | 0.1 ng/ $\mu$ L                            | [7]       |
|          | Electrochemical method | A liver extract                       | <4 min         | 2.5 $\mu$ mol/L                            | [8]       |
| DTE      | Optical sensing        | Pharmaceutical samples                | 5 min          | 0.54 $\mu$ mol/L                           | [9]       |
|          | HPLC                   | Pharmaceutical and biological samples | 10 min         | $2.5 \times 10^{-5}$ mol/L                 | [10]      |
| DTT, DTE | CEC                    | Commercial sample Purity test         | 8 min          | 0.035 mg/mL for DTT<br>0.037 mg/mL for DTE | This work |

## References

- [1] M. Gao, J. Wang, Z. Rong, Q. Shi and J. Dong, RSC Advances, 2018, 8, 39627-39634. (DOI: 10.1039/C8RA08460B)
- [2] Y. Liu, D. Huang, C. Zhuo, M. Guo, L. Chen, X. Chen, H. Li and W. Xu, Talanta, 2025, 283, 127099. (DOI: 10.1016/j.talanta.2024.127099)
- [3] W Morris, B Leung, H Furukawa, OK Yaghi, N He, H Hayashi, Y Houndonougbo and M Asta, Journal of the American Chemical Society, 2010, 132, 11006-11008. (DOI: 10.1021/ja104035j)
- [4] C Wang, B Dong, X Kong, N Zhang and W Song and W Lin, Luminescence, 2018, 33, 1048-1053. (DOI: 10.1002/bio.3507)
- [5] L Zhao, L Zhao, Y Miao, C Liu and C Zhang, Sensors, 2017, 17, 626. (DOI: 10.3390/s17030626)
- [6] S Guo, F Zheng, F Zeng and S Wu, Sensors and Actuators B: Chemical, 2016, 224, 88-94. (DOI: 10.1016/j.snb.2015.10.036)
- [7] M Cindrić, T Lepo, S Marinc, I Paškvan, I Mijić, L Bindila and J Peter-Katalinić, Journal of

separation science, 2008, 31, 3489-3496. (DOI: 10.1002/jssc.200800207)

[8] Z. Glatz and P. Ševčíková, Journal of Chromatography B, 2002, 770, 237-241. (DOI: 10.1016/S0378-4347(01)00526-6)

[9] K. Güçlü, M. Özyürek, N. Güngör, S. Baki and R. Apak, Analytica Chimica Acta , 2013, 794, 90-98. (DOI: 10.1016/j.aca.2013.07.041)

[10] M. Özyürek, S. Baki, N. Güngör, S. E. Çelik, K. Güçlü and R. Apak, Analytica Chimica Acta, 2012, 750, 173-181. (DOI: 10.1016/j.aca.2012.03.056)
